# Supplementary material for: Light Emitting Diode Photobiomodulation Enhances Oxidative Redox Capacity in Murine Macrophages Stimulated with Bothrops jararacussu Venom and Isolated PLA2s
Source: Hindawi journal article supplement (doi:10.1155/2022/5266211), 2022-01-01

# Supplementary Figure 1

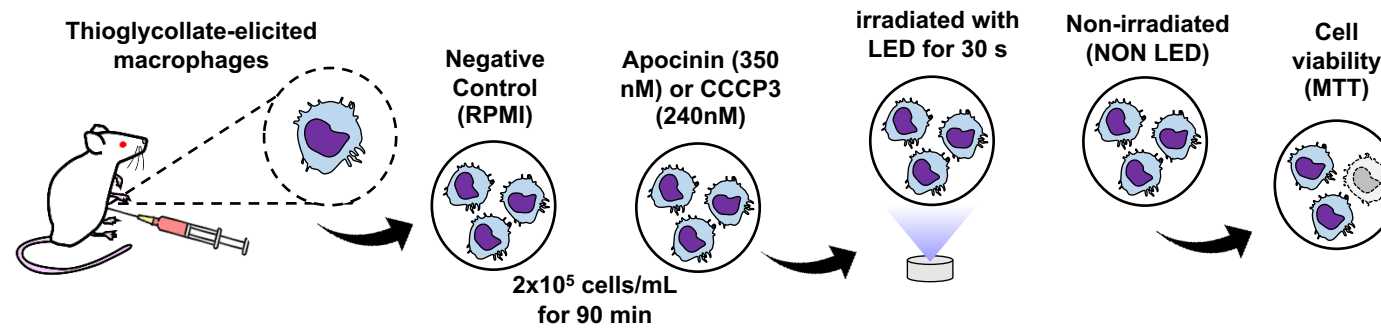

## Cell viability

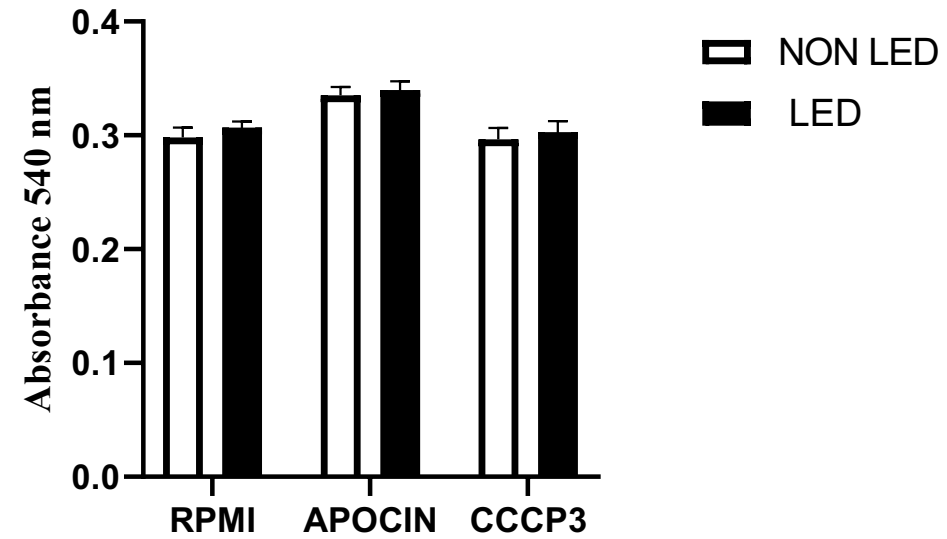

Supplement: f1 [file 5266211.f1.pdf]
